# Supplementary material for: Synthetic Hexanucleotides as a Tool to Overcome Excessive Neutrophil Activation Caused by CpG-Containing Oligonucleotides
Source: MDPI journal article supplement (doi:10.3390/pathogens10050530), 2021-04-28
Supplement: s1 [file s1]

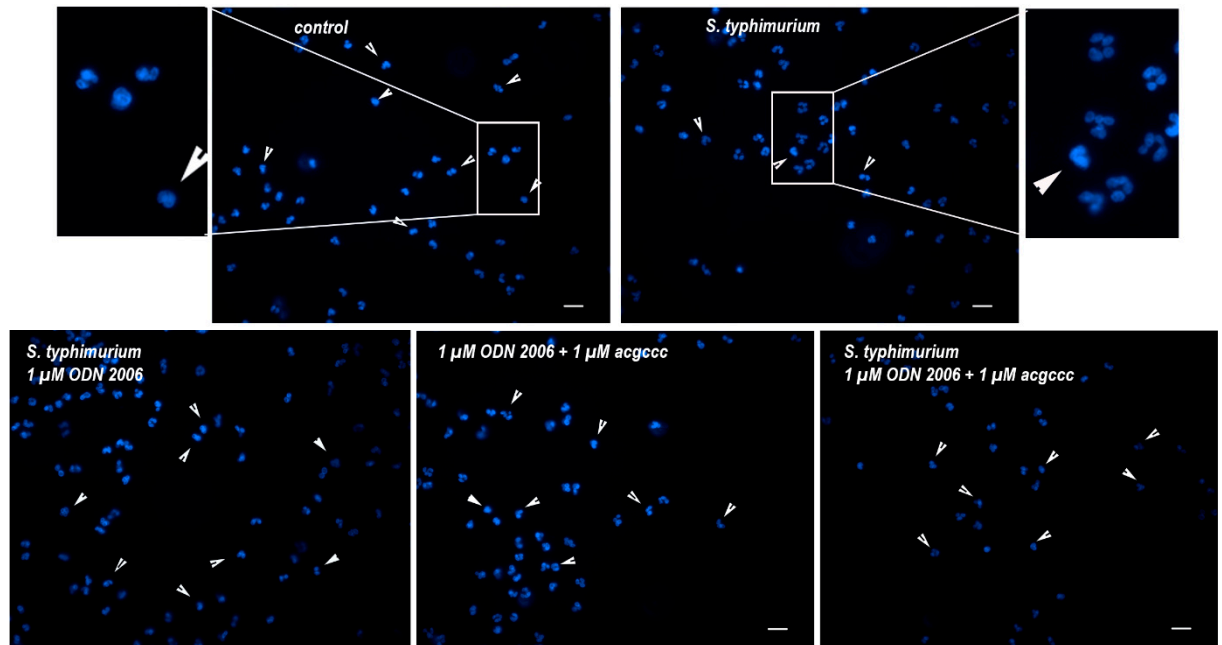

Figure S1. CpG-ODN 2006 is able to overcome the antiapoptotic *S. typhimurium* effect regardless of the presence of hexanucleotide. PMNLs ( $5 \times 10^5$  cells/mL RPMI 1640, 10% fetal bovine serum) were incubated in glass bottom dishes for 5 hours at 37 °C in 5% CO<sub>2</sub> in the presence of ODN 2006, supplemented or not with an equimolar amount of hexanucleotide (acgccc). *S. typhimurium* bacteria (at 1:10 cells per bacteria ratio) were added simultaneously with the stimuli. Unfixed cells were then stained with 0.5 μg/mL Hoechst 33342 for 10 min. Chromatin fluorescence was immediately visualized using a Zeiss Axiovert 200 M Inverted Microscope. Arrowheads indicate pyknotic nuclei. Scale bars: 20 μm. Magnification: 40×.
